# Supplementary material
Source: Frontiers journal article supplement (https://www.frontiersin.org/articles/206014)
Supplement: Data_Sheet_1.docx [file Data_Sheet_1.docx]

**Annex 1. Questionnaire on recurrence of dynamite fishing activities along coastal areas of Tanzania**

1. Name of respondents______________________
2. Age in years_______________________________
3. Age category 18-30, 31-50, >50______________
4. Occupation of respondent____________________
5. Education level: Primary Secondary Tertiary Others None_________________
6. Length of residence in the village: Less than one year,1-5 years, 6-10 years , more than 10 years___
7. If you are a fisher, are you a full-time or part time fisher?______________
8. If you are a fisher, what is the length of time involved in fishing? Less than 10 years, 11-20 years, 21-30 years, more than 30 years_________________________
9. Have you ever used dynamite to catch fish? Yes No________________
10. What is the composition of dynamite fishing team?
11. How often do you see dynamite issues in village meetings? Never, Sometimes, Frequently_______
12. When did you first notice the use of dynamite for fishing? 1=They were already used when I began fishing 2=They came into use during my time in fishing 3= Not sure
13. What is the temporal patterns of dynamite fishing 1= Year around 2= Seasonal 3=Tide-dependent 4=Don't know
14. Do you believe dynamite fishing activities in recent years have generally: Increased, Decreased, Stayed the same, Don't know______________________
15. Do you believe the spread of dynamite in your village in recent years? Yes, No, Don't know_____
16. Which factors have been to the recent occurrence of dynamite fishing in your area?__________
17. Do you know if there has been any major change in prevalence of dynamite fishing over time in your village? 1= Yes (please describe) 2= No 3= Don't know
18. How serious do you think dynamite problems are? 1=not seriously at all 10= very serious
19. Measures to stop dynamite have failed to yield expected outcomes 1=strongly disagree 2=partially disagree 3=undecided 4= partially agree 5=strongly agree
20. Where do most fishermen obtain dynamite? 1=illegally imported explosives 2=public work department 3=construction sites 4=mining sites 5=others, specify
21. What priority does dealing with destructive fishing practices have in the marine resource management agencies in Tanzania? 1=high priority 2=moderate 3=low priority
22. How have you observed fishers fishing with dynamite? 1=on foot 2=on dugout canoe 3=on a sail boat 4=on a motorised boat 5= Others 6= Don't know
23. Who have you observed often fishing with dynamite? 1< 18, 2=18-40 3=40-55, 4> 55
24. Do you know what proportion of fishers are using dynamite in your village= 1= Yes (please describe) 2= No 3= Don't know
25. In your opinion do you think people fish with dynamite 1= For domestic consumption 2=To sell the catch 3=A mix of both 4= Don't know
26. Are you aware of any legal restrictions to the use of dynamite for fishing in your village? 1= Yes 2= No 3= Don't know
27. Are you aware of any local customs or rules which relate to the use of dynamite fishing? 1= Yes (please describe) 2= No
28. Is there effective informal enforcement of laws against dynamite fishing practices at the community or village level?
29. How do dynamite relate to other gears? 1= Used instead of existing gears 2=Used additionally to existing gears 3=Other (please describe)
30. Media coverage to raise awareness of community on dynamite problem is scant Yes No_________
31. Are you currently involved in any initiative or group to stop dynamite fishing? (1=Yes, 2=No)
32. In your view, what are the necessary steps to defend against dynamite?
33. Why might a household choose to use dynamite for fishing (give up to 3 reasons)
34. Why might a household not choose to use dynamite for fishing (give up to 3 reasons)
35. What are the key factors for recurrence of dynamite fishing in your area?
36. Who are the key players in dynamite fishing activities?
37. What are the activities provided by the government to stop dynamite? Are they sufficient?
